# Supplementary material for: Effect of sulfur doping on structural reversibility and cycling stability of a Li2MnSiO4 cathode material
Source: Royal Society of Chemistry journal article supplement (doi:10.1039/c8dt02226g), 2018-01-01
Supplement: c8dt02226g1.pdf [file c8dt02226g1.pdf]

## Supplementary Materials

### Effect of Sulfur Doping on Structural Reversibility and Cycling

#### Stability of $\text{Li}_2\text{MnSiO}_4$ Cathode Material

Xia Wu<sup>a,b</sup>, Shi-Xi Zhao<sup>\*a</sup>, Lü-Qiang Yu<sup>a,b</sup>, Jin-Lin Yang<sup>a,b</sup> and Ce-Wen Nan<sup>b</sup>

<sup>a</sup> Graduate School at Shenzhen, Tsinghua University, Shenzhen, 518055, China.

<sup>b</sup> School of Materials Science and Engineering, Tsinghua University, Beijing, 100084, China

\*Corresponding Author: Shi-Xi Zhao; Email: [zhaosx@sz.tsinghua.edu.cn](mailto:zhaosx@sz.tsinghua.edu.cn)

#### Figures:

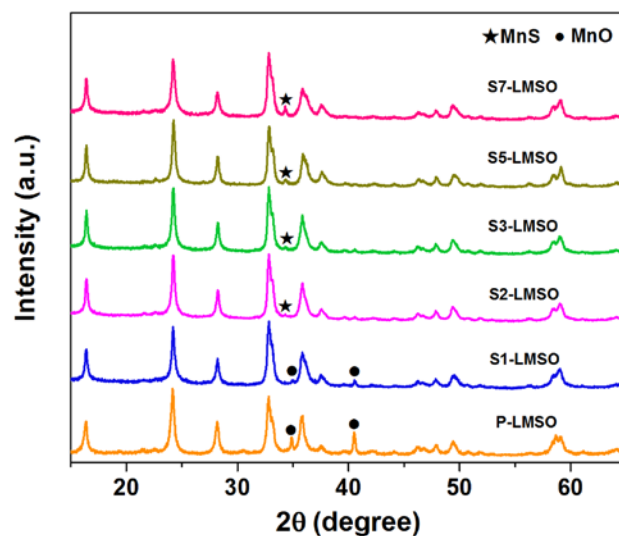

**Fig. S1** The XRD patterns of  $\text{Li}_2\text{MnSiO}_{4-x}\text{S}_x/\text{C}$  ( $x = 0, 0.01, 0.02, 0.03, 0.05$  and  $0.07$ ) samples.

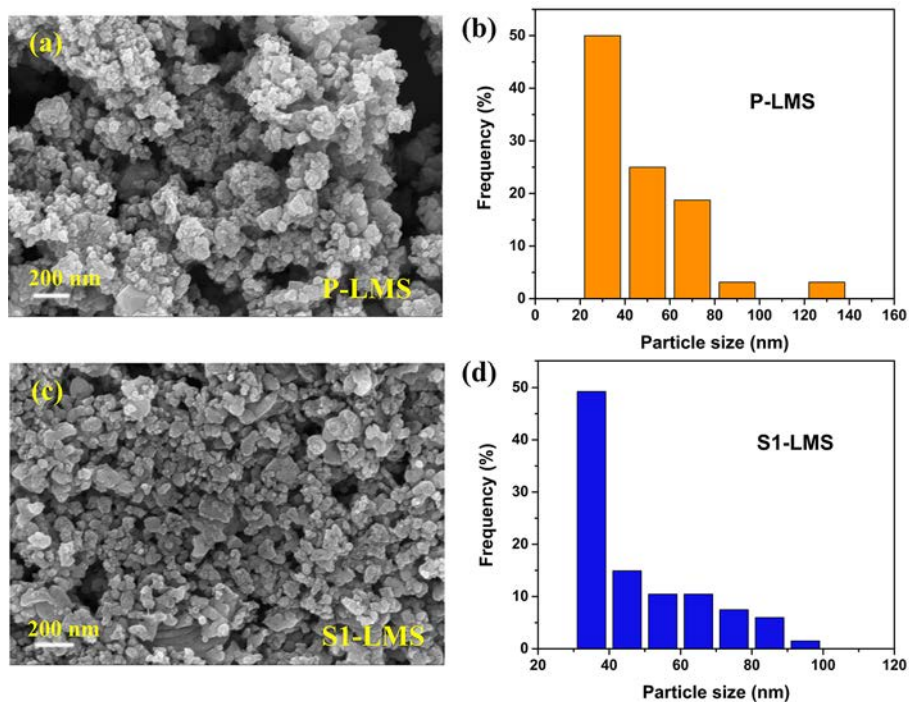

**Fig. S2** SEM images of (a) P-LMS and (c) S1-LMS samples. The particle size distribution of (b) P-LMS and (d) S1-LMS samples.

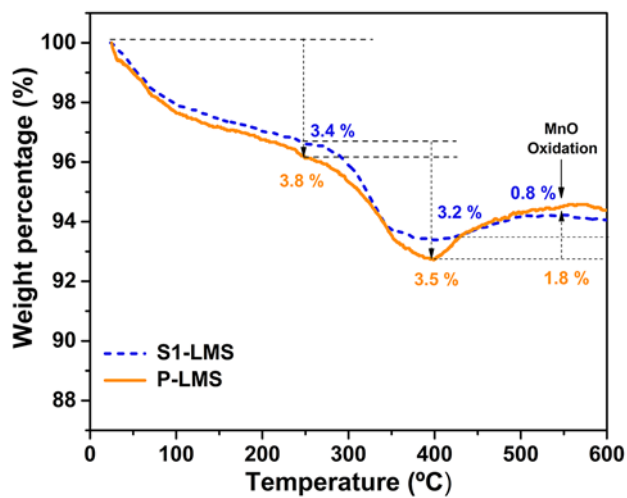

**Fig. S3** TG curves of P-LMS and S1-LMS samples in the range of 50-600 °C at 10 /min rate in air.

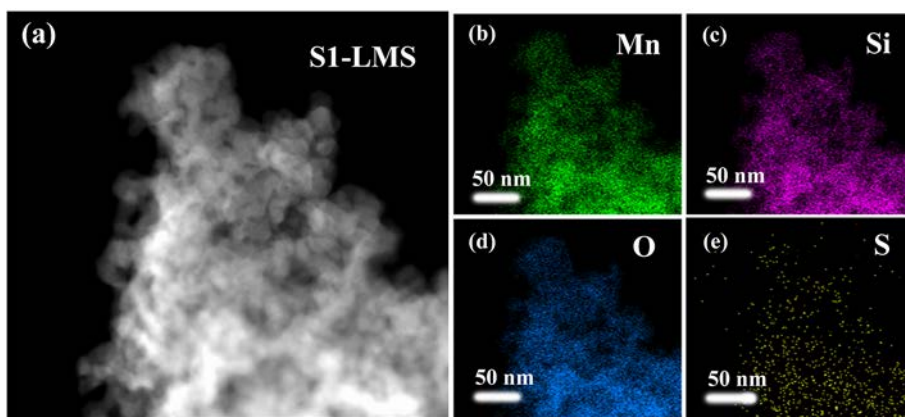

**Fig. S4** HRTEM image (a) and elemental mapping (b-e) of S1-LMS sample.

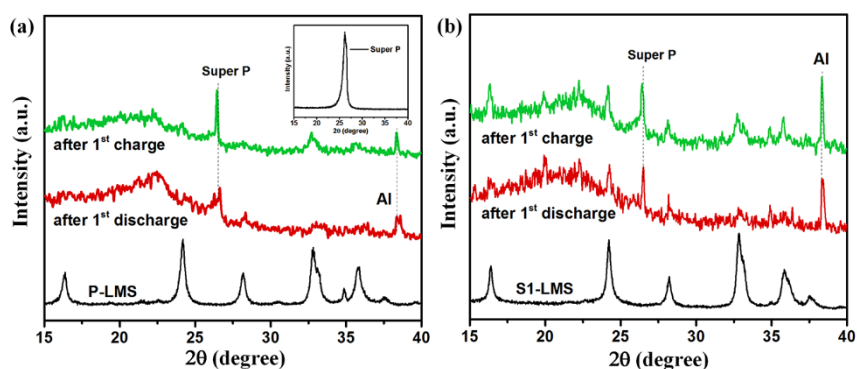

**Fig. S5** *Ex-situ* XRD patterns of P-LMS and S1-LMS samples before and after first charge/discharge.

**Table S1**  $I_D/I_G$  value of P-LMS and S1-LMS samples before/after cycling.

| Samples | before cycle | after first charge | after first discharge |
|---------|--------------|--------------------|-----------------------|
| P-LMS   | 0.44         | 0.59               | 0.71                  |
| S1-LMS  | 0.42         | 0.56               | 0.66                  |

### The details of EIS fitting and calculation.

EIS was performed to explore the effect of S doping on reaction kinetic. The collected plots consist of a semicircle in the high frequency region and a straight line in the low frequency region (Fig. 7c, d). The semicircle diameters are associated with the charge transfer resistance ( $R_{ct}$ ) and the straight lines correspond to the lithium ion

diffusion process. The slope of the inclined line (insets) is Warburg factor ( $\sigma$ ). The lithium ion diffusion coefficient ( $D_{Li^+}$ ) is calculated by following equation:

$$D = \frac{R^2 T^2}{2A^2 n^4 F^4 C^2 \sigma_w^2}$$

R is the gas constant ( $8.314 \text{ J mol}^{-1} \text{ K}^{-1}$ ), T is the absolute temperature ( $298.15 \text{ K}$ ), A is the area of cathode electrode ( $0.95 \text{ cm}^2$  in our work), n is the number of electrons (2 in theory), F is the Faraday constant ( $96485 \text{ C} \cdot \text{mol}^{-1}$ ), C is the molar concentration of lithium ion ( $0.0098 \text{ mol} \cdot \text{cm}^{-3}$ ) and  $\sigma$  is the Warburg coefficient. The fitting results and calculations are displayed in Table 2.
